## VENTILATORY AND BLOOD ACID–BASE ADJUSTMENTS TO A DECREASE IN BODY TEMPERATURE FROM 30 TO 10 °C IN BLACK RACER SNAKES *COLUBER CONSTRICTOR*

J. N. STINNER, M. R. GRGURIC AND S. L. BEATY

The Department of Biology, The University of Akron, Akron, OH 44325-3908, USA

Accepted 29 November 1995

### Summary

There is increasing evidence that many amphibian and reptilian species use relatively slow ion-exchange mechanisms in addition to ventilation to adjust pH as body temperature changes. Large changes in blood bicarbonate concentration with changes in temperature have previously been reported for the snake *Coluber constrictor*. The purpose of the present study was to determine the ventilatory and pH adjustments associated with the increase in CO<sub>2</sub> stores when the snakes are cooled. Body temperature was lowered from 30 to 10 °C within 4 h, at which time measurements of inspired minute ventilation ( $\dot{V}_{\text{air}}$ ), O<sub>2</sub> consumption ( $\dot{V}_{\text{O}_2}$ ) and CO<sub>2</sub> production ( $\dot{V}_{\text{CO}_2}$ ) were started and continued for 56 h. The decrease in temperature produced a transient fall in the respiratory exchange ratio ( $\dot{V}_{\text{CO}_2}/\dot{V}_{\text{O}_2}$ ) to 0.2–0.3 and a steady-state value of  $0.65 \pm 0.14$  (mean  $\pm$  S.D.,  $N=7$ ) was not achieved until about 35 h. There were concomitant transient reductions in

$\dot{V}_{\text{air}}$  and  $\dot{V}_{\text{air}}/\dot{V}_{\text{O}_2}$ . However,  $\dot{V}_{\text{air}}/\dot{V}_{\text{CO}_2}$  initially increased, with a corresponding reduction in arterial  $P_{\text{CO}_2}$  ( $P_{\text{aCO}_2}$ ) and increase in arterial pH. By 35 h,  $\dot{V}_{\text{air}}/\dot{V}_{\text{CO}_2}$  had decreased and  $P_{\text{aCO}_2}$  had increased to steady-state levels, but pH decreased very little because of a gradual increase in bicarbonate concentration. We conclude that the drop in temperature imposed a metabolic acidosis for approximately 35 h because of the time required to increase bicarbonate concentration, and that the acidosis was compensated for by an elevated  $\dot{V}_{\text{air}}/\dot{V}_{\text{CO}_2}$ . Steady-state breathing and acid–base status were not achieved until the relatively slow increase in CO<sub>2</sub> stores had been completed.

Key words: snake, *Coluber constrictor*, reptile, temperature, air convection requirement, ventilation, respiratory exchange ratio, oxygen consumption, carbon dioxide production, acid–base balance, pH, lactate.

### Introduction

The effect of temperature upon acid–base status in ectotherms has been intensively studied, beginning with the pioneering work on alligators by Austin *et al.* (1927). The consistent and by now familiar picture that has developed is that pH rises when body temperature falls, although the slope of this relationship ( $\Delta\text{pH}/\Delta T$ ) varies considerably among species, over different temperature intervals within a species, and even among tissues within individual animals (Heisler, 1986). Much of the early work was carried out on the blood of reptilian and amphibian species in which it was shown that  $\Delta\text{pH}/\Delta T \approx 0.017$  pH units °C<sup>-1</sup> and that arterial  $P_{\text{CO}_2}$  ( $P_{\text{aCO}_2}$ ) decreased with decreasing temperature over a wide temperature range. Robin (1962), Robin *et al.* (1969) and Reeves (1972) were impressed by the similarity between these *in vivo* adjustments and the acid–base response of an *in vitro* sealed (constant CO<sub>2</sub> content) sample of blood equilibrated at different temperatures (Rosenthal, 1948). They concluded that, just as in the Rosenthal system, the thermally induced acid–base adjustments in air-breathing ectotherms were the result of passive physico-chemical changes in the equilibrium

constants of the principal buffers and the CO<sub>2</sub> solubility coefficient. This concept is embodied in Reeves' general theory of acid–base balance, termed the alaphastat hypothesis (Reeves, 1972).

Animals are, of course, open systems with respect to CO<sub>2</sub>, and so it was recognized that physiological control of ventilation was needed to preserve the  $P_{\text{CO}_2}$  that was automatically produced by the passive physical effects of a temperature change upon the chemical equilibria of the blood buffers. More specifically, air-breathing ectotherms must increase ventilation relative to metabolism, i.e. they must increase the air convection requirement ( $\dot{V}_{\text{air}}/\dot{V}_{\text{O}_2}$ ,  $\dot{V}_{\text{air}}/\dot{V}_{\text{CO}_2}$ ) as temperature decreases. This relative hyperventilation acts to hold the appropriate  $P_{\text{aCO}_2}$  at its physico-chemically determined value; i.e. the change in air convection requirement does not produce a new  $P_{\text{aCO}_2}$  but rather it simply preserves the  $P_{\text{aCO}_2}$  produced by the shifts in the chemical equilibria. The first study to report an increase in air convection requirement at reduced temperature in air-breathing ectotherms was the seminal work by Jackson (1971) on freshwater turtles *Pseudemys* (= *Trachemys*) *scripta elegans*. His

findings have since been confirmed on a variety of other reptilian species and this has led to the commonly held view that, in response to a temperature change, physiological control of acid–base adjustments is ventilatory and there is no significant metabolic regulation of pH, i.e. no ion exchange (see review by Reeves, 1977). A putative advantage of this system, in which acid–base adjustments result from shifts in chemical equilibria that are accompanied by rapid changes in the air convection requirement, is that acid–base transitions can be accomplished virtually instantaneously with changes in body temperature and hence disruption of pH-dependent physiological processes is avoided (Reeves and Malan, 1976). Consistent with this concept, several studies examined the time course of temperature effects on blood (plasma) acid–base status and concluded that they occur rapidly and that a period of acclimation is not necessary to obtain steady-state results (Baumgardner and Rahn, 1967; Jackson and Kagen, 1976; Ackerman and White, 1980; Bickler, 1981; Douse and Mitchell, 1991).

Increasingly, however, there is convincing evidence that many air-breathing ectotherms employ relatively slow ion-exchange mechanisms to adjust acid–base status with changes in temperature (Nolan and Frankel, 1982; Stinner and Wardle, 1988; Lutz *et al.* 1989; Stinner *et al.* 1994). The emerging picture is that air-breathing ectotherms utilize a combination of respiratory and metabolic mechanisms and hence are not unlike water breathers (Butler and Day, 1993; Gaillard and Malan, 1985). The relative contributions of these two control mechanisms probably differ substantially among species and among tissues within an animal. For example, plasma  $[\text{HCO}_3^-]$  is independent of temperature in the American alligator *Alligator mississippiensis*, but varies by  $0.23 \text{ mmol l}^{-1} \text{ } ^\circ\text{C}^{-1}$  in black racer snakes (Douse and Mitchell, 1991; Stinner and Wardle, 1988). Kayser (1940) reported that blood  $[\text{CO}_2]$  changed by approximately  $0.7 \text{ mmol l}^{-1} \text{ } ^\circ\text{C}^{-1}$  when the Mediterranean spur-thighed tortoise *Testudo graeca* was cooled from 20 to 5 °C. In the cane toad *Bufo marinus*, plasma  $[\text{HCO}_3^-]$  is independent of body temperature from 30 to 10 °C, whereas many tissues in the toad exhibit striking changes in intracellular  $[\text{CO}_2]$  over this temperature range (Boutilier *et al.* 1987; Stinner *et al.* 1994). Consequently, acid–base adjustments associated with changes in body temperature are complex and cannot be assumed to occur rapidly in many species. In black racer snakes cooled from 30 to 5 °C within a few hours, blood  $[\text{CO}_2]$  did not reach steady-state levels until approximately 60 h after the decrease in temperature (Stinner and Wardle, 1988). Relatively slow changes in blood  $[\text{CO}_2]$ , and hence  $[\text{HCO}_3^-]$ , in other amphibian and reptilian species cooled to low temperatures have also been reported by early investigators (see Kayser, 1940).

The objective of the present study was to determine the time course of ventilatory adjustments related to acid–base regulation in a species known to exhibit large increases in blood  $[\text{HCO}_3^-]$  when body temperature is lowered. Consequently, we chose the black racer snake *Coluber constrictor*, which we cooled from 30 to 10 °C within 4 h and

then monitored acid–base status and air convection requirement. We hypothesized that air convection requirement would not reach steady-state levels until the relatively slow increase in  $\text{CO}_2$  stores had been completed.

## Materials and methods

### Animals

Black racer snakes *Coluber constrictor* L. were purchased from a commercial supplier and flown to Ohio. The snakes were housed two to three per cage (120 cm × 55 cm × 25 cm; length, width, height). A light bulb inside each cage set to a 12 h:12 h L:D cycle afforded a basking site at about 35 °C. Room temperature was thermostatically controlled at 27–29 °C. Approximately once weekly, the snakes were fed on mice and rat pups. Water was available at all times. All animals used in this study appeared to be in excellent health. They were fasted for 1 week prior to experimentation.

### Ventilation and metabolism

Ventilation volumes were measured plethysmographically. Close-fitting latex masks were constructed as previously described (Stinner, 1982). The anterior portion of the mask covering the eyes and nares was cut away and enlarged with clear silicone rubber to form a chamber of approximately 5 ml with incurrent and excurrent air ports. The masks were sealed to the animals with cyanoacrylate adhesive (Krazy Glue). Care was taken to flush the masks continuously with room air during cementing.

The masked animals were placed inside a 26.5 cm × 15 cm × 41 cm (width, height, length) acrylic chamber that served as the plethysmograph. The plethysmograph was housed inside a temperature-controlled cabinet (Precision Scientific model 815, ±1 °C). The ports of the masks were connected to 6 mm i.d. flexible silastic tubing. Outside the plethysmograph, the incurrent air line was extended by a 40 cm section of Tygon tubing (1 cm i.d.) into a container filled with water absorbent (Drierite). The container was open to the cabinet air. This incurrent air line set-up ensured a negligible resistance to breathing in order to avoid unnatural pressures associated with a closed head chamber (Clark *et al.* 1978). Air was drawn through the container, tubing and mask at approximately  $200 \text{ ml min}^{-1}$  by R-1 flow control pumps (Ametek, Pittsburg, PA, USA) situated outside the temperature cabinet. The snakes were left unrestrained within the sealed plethysmograph.

The temperature-controlled cabinet containing the plethysmograph was equipped with a one-way mirror so that the snakes could be observed. Air from inside the cabinet was continuously drawn through the Drierite container into the incurrent air line, mask and excurrent air line. Outside the cabinet, a sample (approximately  $150 \text{ ml min}^{-1}$ ) of the excurrent air was directed through a Drierite column to oxygen and carbon dioxide analyzers (Ametek, models S3A and CD3A, respectively). The oxygen analyzer was calibrated twice daily using dry,  $\text{CO}_2$ -free room air (20.95 %  $\text{O}_2$ ), and the

CO<sub>2</sub> analyzer was calibrated twice daily with dry CO<sub>2</sub>-free room air and a 1.50% CO<sub>2</sub> (balance air) certified gas mixture. Accuracy ( $\pm 0.01\%$  O<sub>2</sub>, 1% of CO<sub>2</sub> reading), response time (90% in 0.1 s for O<sub>2</sub>, 0.03 s for CO<sub>2</sub>) and stability of the analyzers were verified by Ametek shortly before this study began. The oxygen and carbon dioxide percentages were recorded using a Gould model 2400S chart recorder. For calculating metabolic rates (see below), the recordings were integrated over 1 h intervals, either by cutting and weighing the paper or by using an Un-Scan-It scanner and digitizing software (Silk Scientific, Inc., Orem, UT, USA). Tidal volumes were measured using a Validyne DP45 differential pressure transducer positioned between the plethysmograph and the temperature cabinet air. The transducer signal was fed into a model CD12 transducer indicator (Validyne Engineering Corp., Northridge, CA, USA) and recorded with a Gould model TA 4000 recorder. The plethysmograph was calibrated using manual injections of air from a syringe at both 30 and 10 °C at rates close to breathing frequencies while the animals were inside the chamber.

The animals were left undisturbed inside the plethysmograph and temperature-controlled cabinet for at least 24 h at 30 °C. Metabolic and breathing rates were then determined for inactive animals over a 1–5 h period. The cabinet temperature was lowered to 10 °C and recordings were continued for 60 h. Temperature within the plethysmograph fell from 30 to 10 °C within 4 h. Preliminary studies in which cloacal temperature was measured with a rectal temperature probe (Yellow Springs Instruments, Yellow Springs, OH, USA) showed that body temperature also fell to  $10 \pm 1$  °C within 4 h. Briefly opening a valve outside the temperature-controlled cabinet allowed for pressure equilibration between the plethysmograph and atmosphere during cooling.

O<sub>2</sub> uptake ( $\dot{V}_{O_2}$ ) was calculated from the equation:

$$\dot{V}_{O_2} = \dot{V}_E \left( \frac{F_{EN_2}}{F_{IN_2}} \right) F_{IO_2} - \dot{V}_E F_{EO_2}, \quad (1)$$

where  $\dot{V}_E$  is the flow rate in the excurrent air line, which was measured using a Brooks flow meter calibrated against a small-animal respirometer (Warren E. Collins, Braintree, MA, USA),  $F_{IN_2}$  and  $F_{IO_2}$  are the fractions of N<sub>2</sub> or O<sub>2</sub> in dry incurrent air, and  $F_{EN_2}$  and  $F_{EO_2}$  are the fractions of N<sub>2</sub> and O<sub>2</sub> in dry excurrent air. The ratio  $F_{EN_2}/F_{IN_2}$  converts  $\dot{V}_E$  to  $\dot{V}_I$ , the flow rate in the incurrent air line (Depocas and Hart, 1957).  $F_{IN_2}$  and  $F_{EN_2}$  were calculated from  $1 - (F_{IO_2} + F_{ICO_2})$  and  $1 - (F_{EO_2} + F_{ECO_2})$  respectively, where  $F_{EO_2}$  and  $F_{ECO_2}$  were obtained by the integration procedure described above.

CO<sub>2</sub> production ( $\dot{V}_{CO_2}$ ) was calculated from the equation:

$$\dot{V}_{CO_2} = \dot{V}_E F_{ECO_2} - \left( \dot{V}_E \times \frac{F_{EN_2}}{F_{IN_2}} \right) F_{ICO_2}, \quad (2)$$

Metabolic rates ( $\dot{V}_{O_2}$  and  $\dot{V}_{CO_2}$ ) are reported in ml STPD kg<sup>-1</sup> h<sup>-1</sup>. For the temperature conversion, incurrent air-line temperature was monitored with a certified instant digital hygrometer/thermometer (Fisher Scientific). The

respiratory exchange ratio (RE) was calculated from the ratio  $\dot{V}_{CO_2}/\dot{V}_{O_2}$ . Inspired minute ventilation was obtained by summing the inspired tidal volumes for 1 h intervals.

#### *Cannulation and blood analyses*

Prior to surgery, 16 snakes were chilled for 2–3 h in crushed ice and 0.1 ml of Lidocaine (2%) was injected at the surgical site. A ventral midline incision was made at the level of the tenth, eleventh and twelfth scales from the anal plate. A PE-50 cannula filled with heparinized (1000 i.u. ml<sup>-1</sup>) saline was advanced several centimeters upstream into the dorsal aorta and tied occlusively. The free end of the cannula was exteriorized laterally using a blunt needle and anchored using sutures and Krazy Glue. The ventral incision was closed with three stitches and sealed using Krazy Glue.

After surgery, the snakes were allowed to recover in their cages for about 72 h. They appeared to be in excellent health and there were no observable effects of the procedure on motor performance. After recovery, the snakes were placed inside individual 16 cm × 26 cm × 36 cm (height, width, length) acrylic chambers, which were housed inside the Precision temperature-controlled cabinets. A swivel extending through the floor of the chamber was attached to the snake near the anal plate by two narrow (2 cm) strips of tape. The trailing end of the cannula was passed out of the temperature-controlled cabinet through the swivel and floor, so that blood could be sampled without disturbing the snake. The total length of the cannula was 50–60 cm. The chambers were continuously flushed throughout the experiment with cabinet air (400 ml min<sup>-1</sup>) using R-1 flow control pumps.

The snakes were left undisturbed for 48 h at 30 °C to adjust to the experimental apparatus. They were not fed while in the chamber, but water was available at all times. In seven of the snakes, cabinet temperature was then lowered to 10 °C; a blood sample was taken 4 h after changing the temperature, and approximately eight further samples were taken from each snake over a 4 day period. During this time, the snakes remained at 10 °C and were left undisturbed.

To sample blood, the cannula deadspace was first flushed by withdrawing its contents (heparinized saline) followed by about 0.2 ml of blood into a syringe. A train of four heparinized microhematocrit capillary tubes was connected to the cannula and the snake's blood pressure rapidly filled each tube with approximately 0.07 ml of blood. A few drops of blood were allowed to run out of the free end of the capillary tube train before sealing in order to avoid using blood exposed to air during collection. The capillary tube train was then detached from the cannula, sealed with Critocaps, and immediately immersed in iced water for future analysis. The blood in the syringe was returned to the snake and the cannula was filled with fresh heparinized saline.

All blood sample analyses were completed within 1 h of collection.  $P_{CO_2}$  and pH were measured using Radiometer BMS-3 electrodes thermostatted to 10 °C and Radiometer PHM72 acid–base analyzers. The  $P_{CO_2}$  electrode was calibrated using a 5.0% CO<sub>2</sub> certified Radiometer gas mixture

and a 1.39% CO<sub>2</sub> mixture supplied by mass flow controllers (model FC-260, Tylan Corp., Torrance, CA, USA). Precision of the P<sub>CO<sub>2</sub></sub> electrode was ±0.01 kPa. The pH electrode was calibrated using Radiometer precision buffers. Precision of the pH electrode was ±0.001 pH units. P<sub>CO<sub>2</sub></sub> and pH electrode calibrations were verified immediately before blood measurements. For plasma [CO<sub>2</sub>], a microhematocrit tube containing 0.07 ml of blood was spun at 15 000 g for 5 min in a microcapillary centrifuge (Haemofuge, Baxter Scientific Products). Plasma [CO<sub>2</sub>] was then determined in duplicate using a Capni-con 3a CO<sub>2</sub> analyzer (Cameron Instrument Co., Port Aransas, TX, USA). Precision of the CO<sub>2</sub> analyzer was ±0.2 mmol l<sup>-1</sup>.

In the remaining nine cannulated snakes, blood samples were collected as described above at the end of the 48 h at 30 °C and then at 2 and 4 h after changing the cabinet temperature to 10 °C. Blood samples taken at 30 °C were analyzed in duplicate for plasma [CO<sub>2</sub>] using the Capni-con 3a CO<sub>2</sub> analyzer, and plasma [lactate] was determined on all 27 blood samples. Within 15 min of blood collection, 100 μl of the plasma was deproteinized by adding 200 μl of a cold 8% perchloric acid solution. The mixture was spun at 15 000 g for 10 min in an Eppendorf microcentrifuge (Fisher Scientific) and the supernatant was then frozen for not more than 3 days before plasma [lactate] analysis using an enzymatic test kit (Sigma no. 726-uv/826-uv) and Coleman Jr II model 6/20 spectrophotometer.

Comparisons between values were performed using paired *t*-tests, Student's *t*-tests, least-squares regression or one-way analysis of variance (ANOVA), and significance was assumed when *P*<0.05. Means ± s.d. are reported for group values.

## Results

### Ventilation and metabolism

Cooling seven masked *C. constrictor* (mean mass 190 g, range 140–249 g) from 30 to 10 °C lowered  $\dot{V}_{O_2}$  from 100.5±16.8 to 11.3±4.4 ml kg<sup>-1</sup> h<sup>-1</sup> and  $\dot{V}_{CO_2}$  from 62.0±9.9 to 7.4±2.9 ml kg<sup>-1</sup> h<sup>-1</sup> (Table 1). The mean metabolic rate at 10 °C was calculated from rates measured from 36 to 60 h after starting the temperature reduction, where metabolic rate appeared to be stable (Fig. 1). The quadratic polynomial expression for oxygen consumption from 4 to 60 h is  $\dot{V}_{O_2}=23.56-0.59t+0.01t^2$ , where *t* is time in hours (*P*<0.01). From 4 to 9 h,  $\dot{V}_{CO_2}$  declined more rapidly than  $\dot{V}_{O_2}$  and a depression below steady-state  $\dot{V}_{CO_2}$  was evident (Fig. 1).  $\dot{V}_{CO_2}$  from 6 to 18 h was significantly lower than at 21–60 h (ANOVA, *P*<0.001). Consequently, RE fell to 0.26±0.1 at 9 h, and then gradually increased to stable values by approximately 35 h. RE from 9 to 33 h was significantly lower (*P*<0.001) than at 36–60 h. RE from 36 to 60 h averaged 0.65±0.14, which was not significantly different from RE at 30 °C (0.64±0.07) (Table 1).

Lowering body temperature significantly decreased breathing frequency from 2.6±1.1 breaths min<sup>-1</sup> to a steady-state value of 0.44±0.18 breaths min<sup>-1</sup> at 10 °C (average after

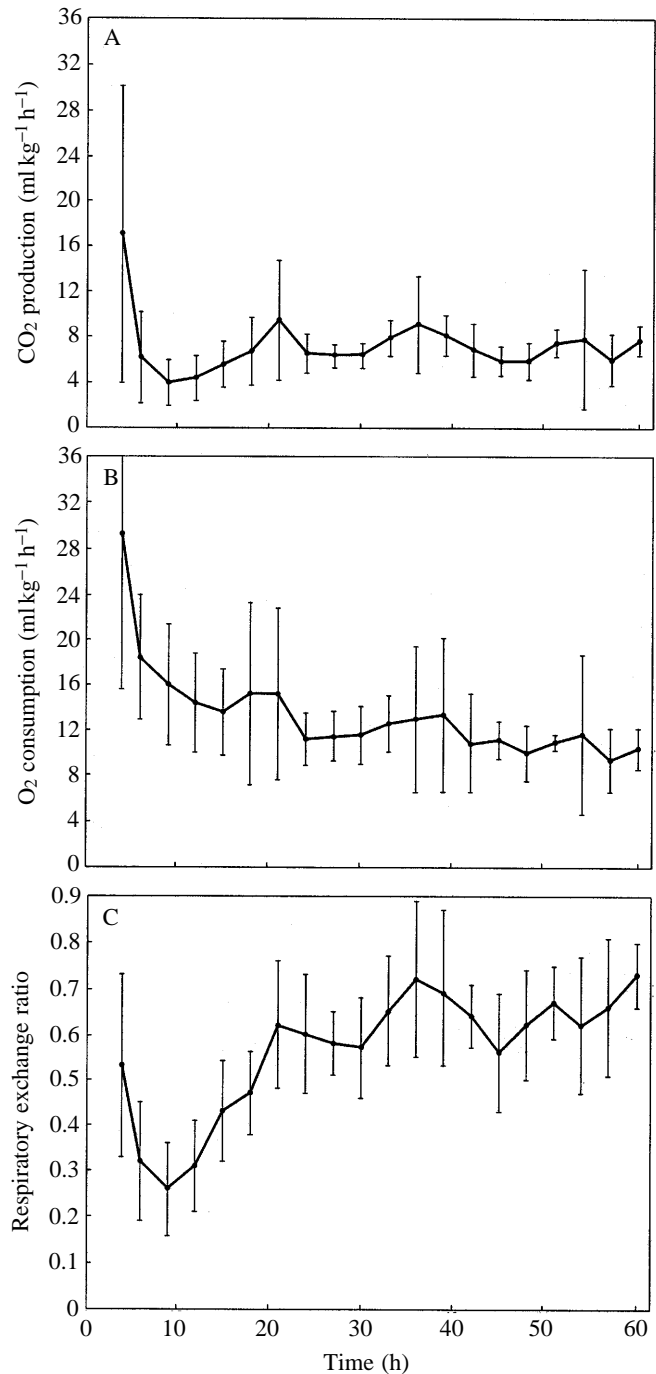

Fig. 1. Effect of changing temperature from 30 to 10 °C on CO<sub>2</sub> production (A), O<sub>2</sub> consumption (B) and the respiratory exchange ratio (C) in seven *Coluber constrictor*. Values are means ± s.d. for 1 h measurement periods. The line connects means. The change in temperature was started at time zero and body temperature fell to 10±1 °C within 4 h.

35 h; Table 1). Tidal volume at 30 °C was not significantly different from tidal volume at 10 °C, and there was no evidence of a change in tidal volume during the time at 10 °C. Minute ventilation ( $\dot{V}_{air}$ ) fell to a steady-state value of 6.4±2.4 ml air kg<sup>-1</sup> min<sup>-1</sup> at 10 °C (average after 35 h). The

Table 1. Steady-state values for metabolic rate, ventilation rate and plasma acid–base status at 30 and 10 °C in the snake *Coluber constrictor*

| Variable                                                                              | 30 °C      | 10 °C       | N   |
|---------------------------------------------------------------------------------------|------------|-------------|-----|
| O <sub>2</sub> consumption (ml kg <sup>-1</sup> h <sup>-1</sup> )                     | 100.5±16.8 | 11.3±4.4*   | 7   |
| CO <sub>2</sub> production (ml kg <sup>-1</sup> h <sup>-1</sup> )                     | 62.0±9.9   | 7.4±2.9*    | 7   |
| Respiratory exchange ratio (ml CO <sub>2</sub> ml <sup>-1</sup> O <sub>2</sub> )      | 0.64±0.07  | 0.65±0.14   | 7   |
| Breathing frequency (breaths min <sup>-1</sup> )                                      | 2.6±1.1    | 0.44±0.18*  | 7   |
| Tidal volume (ml breath <sup>-1</sup> )                                               | 20.3±7.8   | 15.0±3.9    | 7   |
| Inspired minute ventilation (ml kg <sup>-1</sup> min <sup>-1</sup> )                  | 48.0±20.4  | 6.4±2.4*    | 7   |
| O <sub>2</sub> air convection requirement (ml air ml <sup>-1</sup> O <sub>2</sub> )   | 28.6±10.0  | 35.6±8.5    | 7   |
| CO <sub>2</sub> air convection requirement (ml air ml <sup>-1</sup> CO <sub>2</sub> ) | 45.5±13.0  | 55.3±16.7   | 7   |
| Arterial P <sub>CO<sub>2</sub></sub> (kPa)                                            | 2.51       | 2.07±0.20   | 6   |
| Plasma [CO <sub>2</sub> ] (mmol l <sup>-1</sup> )                                     | 21.8±2.3   | 25.1±1.7*   | 9,7 |
| Plasma pH                                                                             | 7.511      | 7.581±0.076 | 7   |
| Plasma [lactate] (mmol l <sup>-1</sup> )                                              | 1.0±0.6    |             | 9   |

Values are means ± s.d.

\* indicates values significantly different ( $P < 0.05$ ) from those at 30 °C.

Arterial plasma P<sub>CO<sub>2</sub></sub> and pH at 30 °C were predicted from equations in Stinner and Wardle (1988).

Values at 10 °C were measured after 35 h following reduction of temperature from 30 °C, except for tidal volume which was measured after 4 h.

pattern of change in breathing frequency and  $\dot{V}_{\text{air}}$  produced by the reduction in temperature appeared to follow that of  $\dot{V}_{\text{CO}_2}$ , with some depression below 10 °C steady-state values evident within the first 24 h (Fig. 2).  $\dot{V}_{\text{air}}$  from 9 to 18 h was significantly lower (ANOVA,  $P < 0.025$ ) than that from 21 to 60 h. However, the apparent reduction in breathing frequency over this period was not significant.

Air convection requirements ( $\dot{V}_{\text{air}}/\dot{V}_{\text{O}_2}$ ,  $\dot{V}_{\text{air}}/\dot{V}_{\text{CO}_2}$ ) did not stabilize until RE had reached steady state, i.e. at about 35 h (Fig. 3).  $\dot{V}_{\text{air}}/\dot{V}_{\text{O}_2}$  was significantly lower ( $P < 0.025$ ) and  $\dot{V}_{\text{air}}/\dot{V}_{\text{CO}_2}$  was significantly higher ( $P < 0.05$ ) at 9–33 h than at 36–60 h.  $\dot{V}_{\text{air}}/\dot{V}_{\text{O}_2}$  followed the same pattern as RE, falling to 19.3±10.2 ml air ml<sup>-1</sup> O<sub>2</sub> at 9 h and then increasing to a steady-state value of 35.6±8.5 ml air ml<sup>-1</sup> O<sub>2</sub>, which was higher but not significantly different ( $P > 0.05$ , Student's *t*-test) from values at 30 °C (28.6±10.0 ml air ml<sup>-1</sup> O<sub>2</sub>, Table 1).  $\dot{V}_{\text{air}}/\dot{V}_{\text{CO}_2}$  followed a very different pattern from  $\dot{V}_{\text{air}}/\dot{V}_{\text{O}_2}$ . Cooling *C. constrictor* produced a hyperventilation relative to  $\dot{V}_{\text{CO}_2}$  which gradually declined to steady-state levels within about 35 h. The quadratic polynomial expression for this pattern is

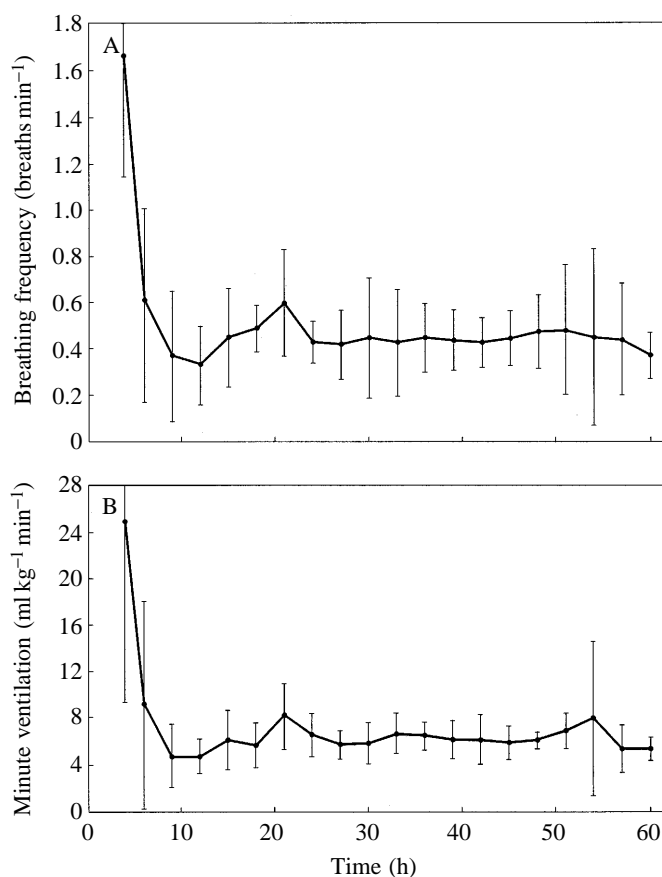

Fig. 2. Effect of changing temperature from 30 to 10 °C on breathing frequency (A) and minute ventilation (B) in seven *Coluber constrictor*. Values are means ± s.d. Other details are as in Fig. 1.

$\dot{V}_{\text{air}}/\dot{V}_{\text{CO}_2} = 91.98 - 1.82t + 0.02t^2$ , where *t* is time in hours ( $P < 0.01$ ). Steady-state  $\dot{V}_{\text{air}}/\dot{V}_{\text{CO}_2}$  at 10 °C (55.3±16.7 ml air ml<sup>-1</sup> CO<sub>2</sub>) was higher but not significantly different from that at 30 °C (45.5±13.0 ml air ml<sup>-1</sup> CO<sub>2</sub>).

#### Plasma P<sub>CO<sub>2</sub></sub>, [CO<sub>2</sub>], pH and [lactate]

Consistent with the changes in  $\dot{V}_{\text{air}}/\dot{V}_{\text{CO}_2}$  with cooling in the snakes, P<sub>aCO<sub>2</sub></sub> was initially low (1.47±0.33 kPa at 4 h) and gradually increased to stable values within about 35 h (Fig. 4). P<sub>aCO<sub>2</sub></sub> measured after 35 h averaged 2.07±0.20 kPa ( $N = 6$ , mean mass 360 g, range 267–464 g). Plasma [CO<sub>2</sub>] also increased during the initial 35 h, from 21.1±2.5 mmol l<sup>-1</sup> at 4 h to a steady-state value of 25.1±1.7 mmol l<sup>-1</sup> (Fig. 4;  $N = 7$ , mean mass 363 g, range 267–464 g). There was a slight decrease in pH during the 100 h of measurements, from 7.665±0.094 at 4 h to 7.574±0.062 at 100 h (Fig. 4). The quadratic polynomial expression for this trend is  $\text{pH} = 7.653 - 0.0019t + 0.00001t^2$  ( $P < 0.01$ ), where *t* is time in hours. There was no significant change in pH after 35 h, and steady-state pH averaged 7.581±0.076 ( $N = 7$ ) at 10 °C. Plasma [lactate] was low at 30 °C, averaging 1.0±0.6 mmol l<sup>-1</sup> ( $N = 9$ , mean mass 246 g, range 208–323 g). Cooling the snakes produced a small, but significant ( $P < 0.05$ ), rise in plasma [lactate] of 0.8 mmol l<sup>-1</sup>

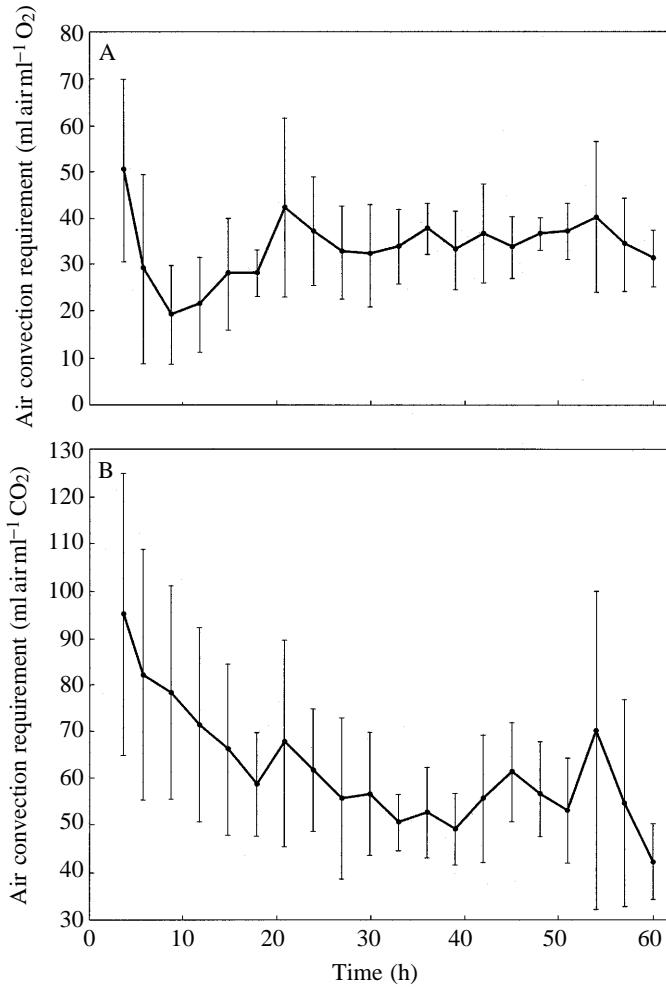

Fig. 3. Effect of changing temperature from 30 to 10°C on air convection requirements (A,  $\dot{V}_{\text{air}}/\dot{V}_{\text{O}_2}$ ; B,  $\dot{V}_{\text{air}}/\dot{V}_{\text{CO}_2}$ ) in seven *Coluber constrictor*. Values are means  $\pm$  S.D. Other details are as in Fig. 1.

(Fig. 5). Plasma [CO<sub>2</sub>] in nine snakes at 30°C was not significantly different from that in seven snakes at 4 h of cooling (Table 1; Fig. 4).

#### Behavior

During cooling, the snakes occasionally moved within the chambers. These movements were deliberate and appeared to involve light to moderate levels of activity. The snakes did not struggle in an attempt to escape the falling temperature. After 4 h at the lower temperature, the snakes rarely moved.

#### Discussion

Our steady-state results are qualitatively similar to those reported previously. Steady-state  $\dot{V}_{\text{O}_2}$ ,  $\dot{V}_{\text{CO}_2}$  and  $\dot{V}_{\text{air}}$  decreased when temperature was lowered from 30 to 10°C, but the decrease in metabolic rate exceeded the decrease in ventilation rate so that the air convection requirement ( $\dot{V}_{\text{air}}/\dot{V}_{\text{O}_2}$  or  $\dot{V}_{\text{air}}/\dot{V}_{\text{CO}_2}$ ) increased. This is a typical pattern for reptiles and accounts for their positive temperature- $P_{\text{aCO}_2}$  relationship (see

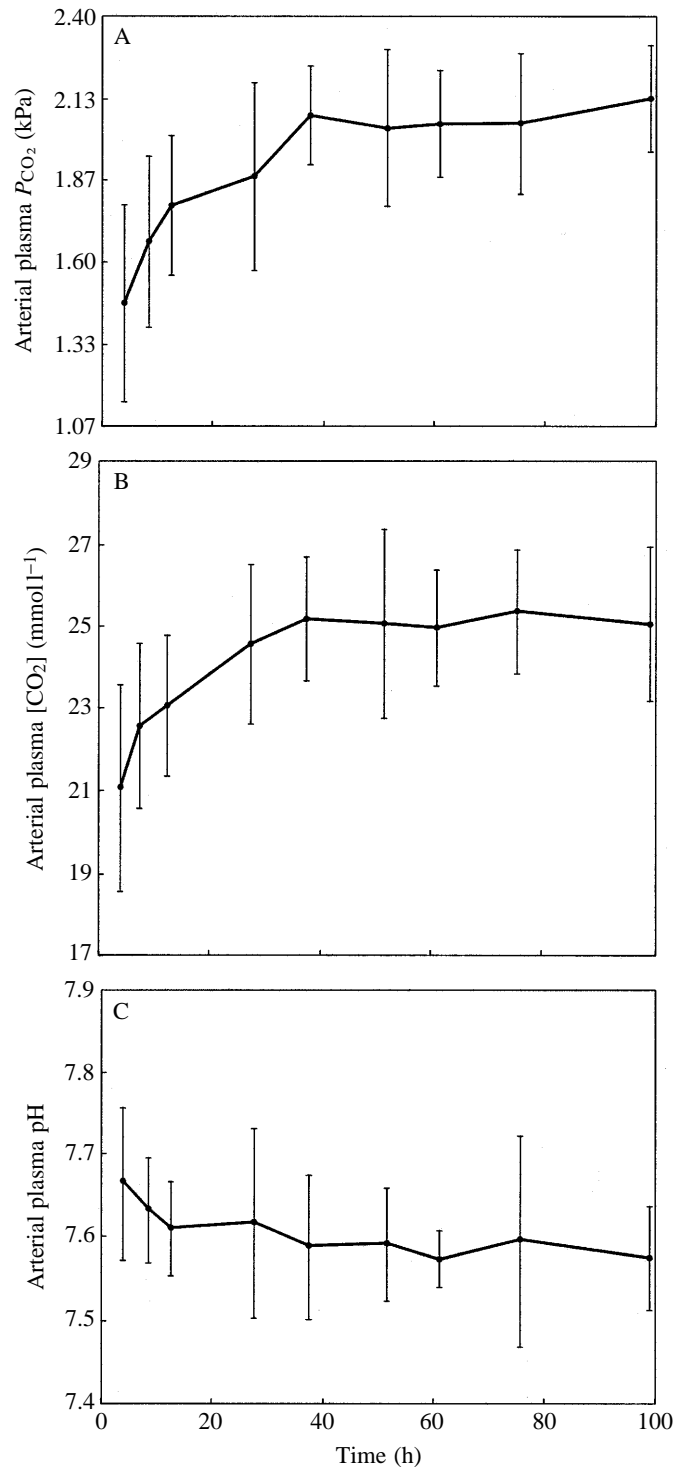

Fig. 4. Effect of changing temperature from 30 to 10°C on arterial plasma  $P_{\text{CO}_2}$ , (A) ( $N=6$ ), [CO<sub>2</sub>] (B) ( $N=7$ ) and pH (C) ( $N=7$ ) in *Coluber constrictor*. Values are means  $\pm$  S.D. Other details are as in Fig. 1. Note that the rise in  $P_{\text{CO}_2}$  was offset by the rise in [CO<sub>2</sub>] so that pH changed very little.

reviews by Jackson, 1986; Glass and Wood, 1983; Reeves, 1977). The increase in steady-state air convection requirement in *C. constrictor* was relatively small (from 28.6 ml air ml<sup>-1</sup> O<sub>2</sub>

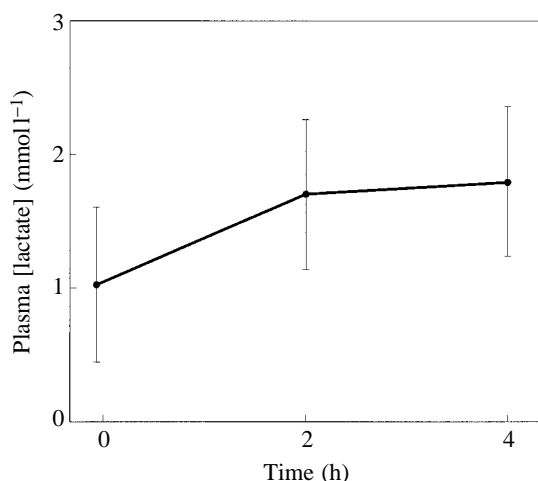

Fig. 5. The effect of lowering body temperature from 30 to 10 °C upon plasma lactate concentration in nine *Coluber constrictor*. Lactate concentration increased by 0.8 mmol l<sup>-1</sup> after 4 h of cooling. Values are means ± S.D.

to 35.6 ml air ml<sup>-1</sup> O<sub>2</sub>) and was not statistically significant ( $P > 0.05$ ). This small increase is, however, consistent with the small decrease in steady-state  $P_{aCO_2}$  measured in *C. constrictor* (2.07 kPa at 10 °C versus 2.51 kPa at 30 °C; Stinner and Wardle, 1988; this study).

Of greater significance to the present study is the transition between steady states. Lowering body temperature from 30 to 10 °C initially depressed the RE, and approximately 35 h was required to re-establish the steady-state value. Many studies have now documented that RE falls transiently with cooling and increases transiently with warming in a variety of amphibian and reptilian species, including urodeles (Cook, 1949), anurans (Dontcheff and Kayser, 1936; Stinner *et al.* 1994), turtles (Hall, 1924; Ludicke, 1936; Kayser, 1940; Benedict, 1932; Stinner and Wardle, 1988; Pages *et al.* 1994), lizards (Kayser, 1940; Potter and Glass, 1931; Cook, 1949; Bickler, 1981; Ackerman and White, 1980), snakes (Benedict, 1932; Stinner, 1982; Stinner and Wardle, 1988) and crocodylians (Ludicke, 1936). These transient changes in RE have been correlated with adjustments in blood [CO<sub>2</sub>] in some species (Kayser, 1940; Ackerman and White, 1980; Bickler, 1981; Stinner, 1982; Stinner and Wardle, 1988) and intracellular [CO<sub>2</sub>] in the toad *Bufo marinus* (Stinner *et al.* 1994).

Kayser (1940) suggested that the depression in RE and accompanying CO<sub>2</sub> retention recorded in reptiles during cooling represented an acidosis much like that in mammalian hibernators entering torpor (see, for example, Nestler, 1990). More recently, in the light of the alaphastat hypothesis, investigators have interpreted the retention of CO<sub>2</sub> as a stress-related respiratory acidosis produced by rapidly cooling the animals below their normal activity temperature range (Ackerman and White, 1980; Bickler, 1981). Stinner (1982) reported an inverse relationship between temperature and blood [CO<sub>2</sub>] over the temperature range 30–20 °C in the snake *Pituophis melanoleucus* and hypothesized that this was caused

by changes in resting levels of lactic acid. However, Stinner and Wardle (1988) showed that this proposal was incorrect because steady-state resting levels of blood lactic acid changed very little with temperature ( $T$ ) changes despite large  $-\Delta[CO_2]/\Delta T$  and  $-\Delta[HCO_3^-]/\Delta T$  coefficients in the blood of *C. constrictor*. They concluded that the depression in RE with cooling and the concomitant rise in blood [HCO<sub>3</sub><sup>-</sup>] resulted from ion-exchange mechanisms that contributed to the now familiar  $\Delta pH_a/\Delta T$  relationship in ectotherms. Given the large number of species known to vary RE with changes in temperature, this conclusion implies that probably most species of air-breathing ectotherms utilize a combination of respiratory and metabolic (ion-exchange) mechanisms to achieve the appropriate temperature-dependent pH. This view is contrary to predictions based upon a Rosenthal system, in which there is no ion exchange and ventilatory control is the sole mechanism used to defend the physico-chemically determined pH (Reeves, 1972).

The time courses required to reach steady-state RE values are strikingly different for cooling compared with heating (Benedict, 1932; Stinner, 1982; Stinner and Wardle, 1988; Stinner *et al.* 1994). This thermal hysteresis presumably reflects the effect of temperature upon the bicarbonate-producing steps, including CO<sub>2</sub> production, membrane transport and possibly tissue blood flow. When, for example, *C. constrictor* was cooled from 30 to 5 °C, approximately 60 h was required to reach steady-state RE values, but only 6–7 h was required when the snakes were reheated to 30 °C (Stinner and Wardle, 1988). The time courses for changes in blood [CO<sub>2</sub>] closely paralleled the transients in RE. The adjustments in RE and blood [CO<sub>2</sub>], particularly for cooling, took considerably longer than the 2–3 h taken to change body temperature. This suggests that physiological adjustments related to acid–base homeostasis continue long after the change in body temperature. The present study demonstrates that, in *C. constrictor*, the ventilatory adjustments associated with temperature-related changes in acid–base status occur relatively slowly and are correlated with the time required to alter CO<sub>2</sub> stores.

Ventilation and acid–base status did not reach steady-state values in *C. constrictor* until about 35 h after starting the decrease in temperature. *C. constrictor* responded to the fall in body temperature by temporarily increasing  $\dot{V}_{air}/\dot{V}_{CO_2}$ , which lowered  $P_{aCO_2}$  and elevated plasma pH. Plasma [lactate] at 30 °C and during the 2–4 h it took to reduce the temperature to 10 °C was low and typical of levels in resting reptiles (Bennett and Dawson, 1976). These low lactate levels are consistent with our observations of only light to moderate activity by the snakes during cooling. Hence, a lactacidosis does not appear to be of primary importance in elevating  $\dot{V}_{air}/\dot{V}_{CO_2}$ . With the relatively slow accumulation of plasma CO<sub>2</sub>, and hence [HCO<sub>3</sub><sup>-</sup>], RE was depressed. Traditionally, [HCO<sub>3</sub><sup>-</sup>] is considered to be the sum of all ionic CO<sub>2</sub> species ([CO<sub>3</sub><sup>2-</sup>], [NaCO<sub>3</sub><sup>-</sup>], [protein-NH-COO<sup>-</sup>]) and is referred to as the apparent [HCO<sub>3</sub><sup>-</sup>] (Siggaard-Anderson, 1974). The apparent [HCO<sub>3</sub><sup>-</sup>] is calculated by subtracting dissolved [CO<sub>2</sub>], i.e.

$\alpha\text{CO}_2 \times P_{\text{CO}_2}$ , from gasometrically determined total  $[\text{CO}_2]$ . At  $10^\circ\text{C}$ , the  $\text{CO}_2$  solubility of plasma ( $\alpha\text{CO}_2$ ) is  $0.4719 \text{ mmol l}^{-1} \text{ kPa}^{-1}$  (Severinghaus, 1965). In *C. constrictor* at  $10^\circ\text{C}$ ,  $P_{\text{aCO}_2}$  increased by  $0.6 \text{ kPa}$  (Fig. 4) and thus dissolved  $[\text{CO}_2]$  increased by  $0.3 \text{ mmol l}^{-1}$ , which is about 7.5% of the change in total  $[\text{CO}_2]$  measured in this study. Consequently, the gradual increase in plasma  $[\text{CO}_2]$  evident in Fig. 4 is primarily the result of  $\text{HCO}_3^-$  production. The site of bicarbonate production has not been determined, but is presumably the kidney, stomach and/or tissues such as skeletal muscle. With the rise in plasma  $[\text{HCO}_3^-]$ ,  $\dot{V}_{\text{air}}/\dot{V}_{\text{CO}_2}$  declined and  $P_{\text{aCO}_2}$  increased to steady-state levels with only a small decrease in plasma pH. This response is suggestive of a metabolic acidosis with respiratory compensation until a new temperature-specific steady-state plasma  $[\text{HCO}_3^-]$  could be achieved. The compensation was rapid since, at  $30^\circ\text{C}$ , plasma pH in *C. constrictor* is 7.511 (Stinner and Wardle, 1988), but within 4 h after cooling began, when the first blood samples were taken, plasma pH was already close to its steady-state value at  $10^\circ\text{C}$ . Correlated with bicarbonate production, and the corresponding depression in pulmonary  $\text{CO}_2$  elimination that produced the low RE, was the transient decrease in  $\dot{V}_{\text{air}}$  and  $\dot{V}_{\text{air}}/\dot{V}_{\text{O}_2}$ .

An alternative interpretation of our results is that the gradual decline in  $\dot{V}_{\text{air}}/\dot{V}_{\text{CO}_2}$  produced the low RE and rise in  $P_{\text{CO}_2}$ , which resulted in the formation of bicarbonate owing to titration of nonbicarbonate buffers (i.e. protein) within the extracellular fluid and red blood cells. However, the nonbicarbonate buffer value of extracellular fluid is much too low to account for the relatively large increase in plasma  $[\text{CO}_2]$  observed in this study, as the following calculations show. Blood hemoglobin concentration and hematocrit in *C. constrictor* are close to  $80 \text{ g l}^{-1}$  and 25%, respectively (Stinner, 1987). Plasma protein concentration is  $50 \text{ g l}^{-1}$  (J. N. Stinner, unpublished results). Blood volume and extracellular fluid volume ('thiocyanate space') in snakes are about 5.5% and 42% of body mass, respectively (Smits and Lillywhite, 1985). Assuming that interstitial fluid contains no protein and that the plasma is well mixed with the interstitial fluid, the hemoglobin and protein concentrations for the whole extracellular fluid volume (interstitial fluid + plasma + red blood cell volume) are  $10.1 \text{ g l}^{-1}$  and  $6.3 \text{ g l}^{-1}$ , respectively. The gram buffer values for hemoglobin and plasma protein are 0.18 and  $0.11 \text{ mmol HCO}_3^- \text{ l}^{-1} \text{ pH unit}^{-1} \text{ g}^{-1}$ , respectively (Siggaard-Anderson, 1974). In *C. constrictor*, plasma pH fell by 0.09 pH units as  $\dot{V}_{\text{air}}/\dot{V}_{\text{CO}_2}$  declined. Hence, the increase in extracellular fluid  $[\text{HCO}_3^-]$  from buffering by hemoglobin is  $0.18 \times 10.1 \times 0.09 = 0.16 \text{ mmol HCO}_3^- \text{ l}^{-1} \text{ ECF}$ , where ECF is extracellular fluid, and from plasma protein buffering would be  $0.11 \times 6.3 \times 0.09 = 0.06 \text{ mmol HCO}_3^- \text{ l}^{-1} \text{ ECF}$ , for a total increase in  $[\text{HCO}_3^-]$  of about  $0.2 \text{ mmol l}^{-1}$ . These calculations ignore the minor corrections for differences in the distribution of  $\text{HCO}_3^-$  between red blood cells and plasma, and the difference between solution *versus* water concentrations. Thus, less than 7% of the rise in plasma  $[\text{CO}_2]$  (see Table 1) can be attributed to nonbicarbonate buffering.

In conclusion, acid-base adjustments are not accomplished instantaneously with changes in body temperature in this species. Although the ionization constants and  $\text{CO}_2$  solubility coefficient presumably decrease virtually instantaneously with a decrease in temperature, the physiologically regulated  $[\text{HCO}_3^-]$  imposes a constraint that prolongs the time course for achieving steady-state ventilation and acid-base status.

## References

- ACKERMAN, R. A. AND WHITE, F. N. (1980). The effects of temperature on acid-base balance and ventilation of the marine iguana. *Respir. Physiol.* **39**, 133–147.
- AUSTIN, J. H., SUNDERMAN, F. W. AND CAMACK, J. G. (1927). Studies in serum electrolytes. II. The electrolyte composition and the pH of serum of a poikilothermous animal at different temperatures. *J. biol. Chem.* **72**, 677–685.
- BAUMGARDNER, F. W. AND RAHN, H. (1967). Normal blood pH of the toad at different temperatures as a function of the ionization constant of water. *Physiologist* **10**, 121.
- BENEDICT, F. C. (1932). *The Physiology of Large Reptiles*. Carnegie Institute Washington Publications.
- BENNETT, A. F. AND DAWSON, W. R. (1976). Metabolism. In *Biology of the Reptilia*, vol. 5 (ed. C. Gans and W. R. Dawson), pp. 127–223. New York, London: Academic Press.
- BICKLER, P. E. (1981). Effects of temperature on acid-base balance and ventilation in desert iguanas. *J. appl. Physiol.* **51**, 452–460.
- BOUTILIER, R. C., GLASS, M. L. AND HEISLER, N. (1987). Blood gases and extracellular/intracellular acid-base status as a function of temperature in the anuran amphibians *Xenopus laevis* and *Bufo marinus*. *J. exp. Biol.* **130**, 13–25.
- BUTLER, P. J. AND DAY, N. (1993). The relationship between intracellular pH and seasonal temperature in the brown trout *Salmo trutta*. *J. exp. Biol.* **177**, 293–297.
- CLARK, B. D., GANS, C. AND ROSENBERG, H. I. (1978). Air flow in snake ventilation. *Respir. Physiol.* **32**, 207–212.
- COOK, S. F. (1949). Respiratory metabolism of certain reptiles and amphibia. *Univ. Calif. Publ. Zool.* **53**, 367–376.
- DEPOCAS, F. AND HART, J. S. (1957). Use of the Pauling oxygen analyzer for measurement of oxygen consumption of animals in open-circuit systems and in a short-lag, closed-circuit apparatus. *J. appl. Physiol.* **10**, 388–392.
- DONTCHEFF, L. AND KAYSER, C. (1936). Effet de concentrations, variées en acide carbonique de l'air atmospherique sur le quotient respiratoire et la reserve alcaline de la grenouille. *C.r. hebd. Séanc. Soc. Biol.* **123**, 815–820.
- DOUSE, M. A. AND MITCHELL, G. S. (1991). Time course of temperature effects on arterial acid-base status in *Alligator mississippiensis*. *Respir. Physiol.* **83**, 87–102.
- GAILLARD, S. AND MALAN, A. (1985). Intracellular pH-temperature relationships in a water breather, the crayfish. *Molec. Physiol.* **7**, 1–16.
- GLASS, M. L. AND WOOD, S. C. (1983). Gas exchange and control of breathing in reptiles. *Physiol. Rev.* **63**, 232–260.
- HALL, F. G. (1924). The respiratory exchange in turtles. *J. Metab. Res.* **6**, 393–401.
- HEISLER, N. (1986). Comparative aspects of acid-base regulation. In *Acid-Base Regulation in Animals* (ed. N. Heisler), pp. 397–450. Amsterdam: Elsevier Biomedical Press.



- JACKSON, D. C. (1971). The effect of temperature on ventilation in the turtle, *Pseudemys scripta elegans*. *Respir. Physiol.* **12**, 131–140.
- JACKSON, D. C. (1986). Acid–base regulation of reptiles. In *Acid–Base Regulation in Animals* (ed. N. Heisler), pp. 235–263. Amsterdam: Elsevier Biomedical Press.
- JACKSON, D. C. AND KAGEN, R. D. (1976). Effects of temperature transients on gas exchange and acid–base status of turtles. *Am. J. Physiol.* **230**, 1389–1393.
- KAYSER, C. (1940). Le quotient respiratoire chez quelques espèces poikilothermes. *Annls physiol. physiochim. Biol.* **16**, 1–68.
- LUDICKE, M. (1936). Untersuchungen uber de respirations und harnguotienten an kaltbluten. *Pflügers Arch. ges. Physiol.* **237**, 222–230.
- LUTZ, P. L., BERGEY, A. AND BERGEY, M. (1989). Effects of temperature on gas exchange and acid–base balance in the sea turtle *Caretta caretta* at rest and during routine activity. *J. exp. Biol.* **144**, 155–169.
- NESTLER, J. R. (1990). Relationships between respiratory quotient and metabolic rate during entry to and arousal from daily torpor in deer mice (*Peromyscus maniculatus*). *Physiol. Zool.* **63**, 504–515.
- NOLAN, W. F. AND FRANKEL, H. M. (1982). Effects of temperature on ventilation and acid–base status in the black racer snake, *Coluber constrictor*. *Comp. Biochem. Physiol.* **73A**, 57–61.
- PAGES, T., FUSTER, J. F. AND PALACIOS, L. (1994). Ventilatory responses to temperature variation in the fresh water turtle, *Mauremys caspica leprosa*. *J. comp. Physiol.* **B 164**, 390–395.
- POTTER, G. E. AND GLASS, H. B. (1931). A study of hibernating horned lizards, *Phrynosoma cornutum*. *Copeia* **1931**, 128–131.
- REEVES, R. B. (1972). An imidazole alphastat hypothesis for vertebrate acid–base regulation: tissue carbon dioxide content and body temperature in bullfrogs. *Respir. Physiol.* **14**, 219–236.
- REEVES, R. B. (1977). The interaction of body temperature and acid–base balance in ectothermic vertebrates. *A. Rev. Physiol.* **39**, 559–586.
- REEVES, R. B. AND MALAN, A. (1976). Model studies of intracellular acid–base temperature responses in ectotherms. *Respir. Physiol.* **28**, 49–63.
- ROBIN, E. D. (1962). Relationship between temperature and plasma pH and carbon dioxide tension in the turtle. *Nature* **195**, 249–251.
- ROBIN, E. D., BROMBERG, P. A. AND CROSS, C. E. (1969). Some aspects of the evolution of acid–base regulation in vertebrates. *Yale J. Biol. Med.* **41**, 448–467.
- ROSENTHAL, T. B. (1948). The effects of temperature on the pH of blood and plasma *in vitro*. *J. biol. Chem.* **173**, 25–30.
- SEVERINGHAUS, J. W. (1965). Blood gas concentrations. In *Handbook of Physiology, Respiration*, vol. II (ed. W. O. Fenn and H. Rahn), pp. 1475–1487. Washington: American Physiological Society.
- SIGGAARD-ANDERSON, O. (1974). *The Acid-Base Status of the Blood*, 4th edn. Copenhagen: Munksgaard.
- SMITS, A. W. AND LILLYWHITE, H. B. (1985). Maintenance of blood volume in snakes: transcapillary shifts of extravascular fluids during acute hemorrhage. *J. comp. Physiol.* **B155**, 305–310.
- STINNER, J. N. (1982). Ventilation, gas exchange and blood gases in the snake, *Pituophis melanoleucus*. *Respir. Physiol.* **47**, 279–298.
- STINNER, J. N. (1987). Cardiovascular and metabolic responses to temperature in *Coluber constrictor*. *Am. J. Physiol.* **253**, R222–R227.
- STINNER, J. N., NEWLON, D. L. AND HEISLER, N. (1994). Extracellular and intracellular CO<sub>2</sub> concentration as a function of body temperature in the toad *Bufo marinus*. *J. exp. Biol.* **195**, 345–360.
- STINNER, J. N. AND WARDLE, R. L. (1988). Effect of temperature upon carbon dioxide stores in the snake *Coluber constrictor* and the turtle *Chrysemys scripta*. *J. exp. Biol.* **137**, 529–548.
